# Supplementary material for: Psychological Impacts Among Yemeni Healthcare Workers During the COVID-19 Pandemic: an Electronic-based, Cross-sectional Analytical Survey
Source: Research Square preprint supplement (doi:10.21203/rs.3.rs-789394/v1), 2021-09-14
Supplement: Supplementary file 1 [file 3a0a1794470337c06c4d41f5.docx]

**Supplementary table: Relationship of age of HCW to number of hours worked per day.**

| Item | | Age (year) | | | | | Occupation | | | | |
| --- | --- | --- | --- | --- | --- | --- | --- | --- | --- | --- | --- |
| ≤ 40 | | > 40 | | p value | Physicians | | Other | | p value |
| N | % | N | % | N | % | N | % |
| Working Hours per day |  |  |  |  |  | 0.028 |  |  |  |  | 0.091 |
|  | ≥8 hrs | 695 | 84.7 | 126 | 15.3 |  | 249 | 30.3 | 572 | 69.7 |  |
|  | 9 - 12 hrs | 262 | 86.2 | 42 | 13.8 |  | 110 | 36.2 | 194 | 63.8 |  |
|  | > 12 hrs | 90 | 94.7 | 5 | 5.3 |  | 25 | 26.3 | 70 | 73.7 |  |
| Working days |  |  |  |  |  | 0.032 |  |  |  |  | 0.934 |
|  | 1 - 3 days | 121 | 89.0 | 15 | 11.0 |  | 42 | 30.9 | 94 | 69.1 |  |
|  | 4 - 6 days | 830 | 84.6 | 151 | 15.4 |  | 311 | 31.7 | 670 | 68.3 |  |
|  | 7 days | 96 | 93.2 | 7 | 6.8 |  | 31 | 30.1 | 72 | 69.9 |  |
